# Supplementary material for: Current and potential providers of blood pressure self-screening: a mixed methods study in Oxfordshire
Source: PubMed Central journal article supplement (PMC5372057; doi:10.1136/bmjopen-2016-013938), 2017-03-22
Supplement: bmjopen-2016-013938supp2.pdf [file bmjopen-2016-013938supp2.pdf]

**Supplementary file two: Comparison of GP practices with and without BP self-screening facilities**

| Variable                                                                                                                                                                   | All (n=79)* |                |               | Practices Offering Blood Pressure Self-Screening (n=14) |                |                | Practices Not Offering Blood Pressure Self-Screening (n= 65) |                |               | P value # |
|----------------------------------------------------------------------------------------------------------------------------------------------------------------------------|-------------|----------------|---------------|---------------------------------------------------------|----------------|----------------|--------------------------------------------------------------|----------------|---------------|-----------|
|                                                                                                                                                                            | Median      | IQR            | Range         | Median                                                  | IQR            | Range          | Median                                                       | IQR            | Range         |           |
| <b>Demographics (2010)</b>                                                                                                                                                 |             |                |               |                                                         |                |                |                                                              |                |               |           |
| GP head count (excluding assistants and registrars) <sup>1</sup>                                                                                                           | 5.0         | 4.0-8.0        | 1.0-12.0      | 6.0                                                     | 4.8-8.0        | 3.0-12.0       | 5.0                                                          | 4.0-8.0        | 1.0-12.0      | 0.359     |
| Weighted IMD 2010 <sup>2</sup>                                                                                                                                             | 10.1        | 7.8-17.8       | 5.4-34.6      | 9.3                                                     | 7.3-14.9       | 6.0-21.8       | 10.3                                                         | 7.2-18.9       | 5.1-34.6      | 0.314     |
| Registered list size 2010 <sup>3</sup>                                                                                                                                     | 8151.0      | 5047.0-10791.0 | 584.0-19782.0 | 8212.0                                                  | 5969.5-12211.5 | 4297.0-18871.0 | 7472.0                                                       | 4604.0-10465.5 | 584.0-19792.0 | 0.472     |
| <b>Performance data (2010-2011)</b>                                                                                                                                        |             |                |               |                                                         |                |                |                                                              |                |               |           |
| Total QOF Points, scored across all domains as a percentage of those available % <sup>3</sup>                                                                              | 99.2        | 97.8-99.7      | 81.1-100.0    | 99.4                                                    | 98.5-99.8      | 96.1-100.0     | 99.2                                                         | 97.8-99.7      | 81.0-100.0    | 0.223     |
| Number of patients on hypertension register                                                                                                                                | 938.0       | 541.0-1333.0   | 79.0-2749.0   | 1095.5                                                  | 782.3-1558.8   | 433.0-2376.0   | 830.0                                                        | 520.0-1239.0   | 79.0-2749.0   | 0.140     |
| Patients with hypertension in whom there is a record of the blood pressure in the previous 9 months: Underlying achievement, net of exceptions, % <sup>3</sup>             | 91.5        | 89.9-93.6      | 79.3-99.5     | 91.1                                                    | 87.7-93.5      | 83.5-96.1      | 91.5                                                         | 90.0-93.7      | 79.3-99.5     | 0.555     |
| Patients with hypertension in whom the last blood pressure (measured in the previous 9 months) is 150/90 or less Underlying achievement, net of exceptions, % <sup>3</sup> | 80.6        | 76.8-85.4      | 57.1-91.7     | 80.4                                                    | 77.6-84.2      | 68.6-86.2      | 80.6                                                         | 73.3-80.2      | 57.1-91.7     | 0.608     |
| Practice hypertension prevalence based on practice register, % <sup>3</sup>                                                                                                | 12.2        | 9.0-14.0       | 3.7-17.7      | 13.9                                                    | 10.2-15.4      | 7.8-16.6       | 12.1                                                         | 8.8-13.8       | 3.7-17.7      | 0.090     |
| Estimated Prevalence of Undetected Hypertension, % <sup>4</sup>                                                                                                            | 11.1        | 9.8-12.4       | 7.0-15.0      | 11.3                                                    | 10.5-11.9      | 8.0-13.0       | 10.9                                                         | 9.8-12.7       | 7.0-15.0      | 0.867     |
| <b>Practice Survey Ratings (2011-12)</b>                                                                                                                                   |             |                |               |                                                         |                |                |                                                              |                |               |           |
| Survey respondents rating surgery experience as very good/good, %                                                                                                          | 93.0        | 88.0-96.0      | 74.0-100.0    | 93.0                                                    | 88.5-96.0      | 79.0-97.0      | 93.0                                                         | 87.0-96.3      | 74.0-100.0    | 0.767     |

\* There were 92 practices in total with 3 practices excluded from the analyses: 1 was a GP surgery providing service for homeless patients only, two borrowed the BPSS equipment purchased by a third practice (they shared a building.)

# test used = independent samples Mann Whitney U Test

#### Data Sources

1. Health and Social Care Information Centre. Number of GPs per registered and weighted practice population, 2010. Accessed via <https://indicators.hscic.gov.uk/webview/>
2. Department for Communities and Local Government. The English Indices of deprivation 2010. Accessed via: [https://www.gov.uk/government/uploads/system/uploads/attachment\\_data/file/6871/1871208.pdf](https://www.gov.uk/government/uploads/system/uploads/attachment_data/file/6871/1871208.pdf)
3. Health and Social Care Information Centre. Quality Outcomes Framework Data 2010/11. Accessed via: <http://qof.hscic.gov.uk/index.asp>
4. Eastern Region Public Health Observatory Modelled Estimated Prevalence of Hypertension, December 2011. Accessed via <http://www.apho.org.uk/resource/item.aspx?RID=111119>
5. Department of Health. Results of 2011-12 GP Patient Survey. Accessed via: <https://www.england.nhs.uk/statistics/2012/06/14/gp-patient-survey-june-2012/>
